# Supplementary material
Source: PubMed Central journal article supplement (PMC4557669)

Figure 2A

Upper left panel

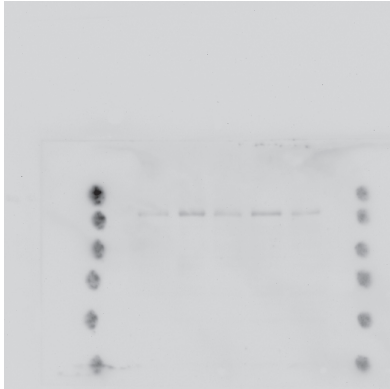

Upper right panel

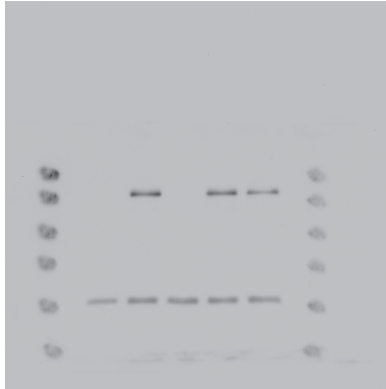

Bottom left panel

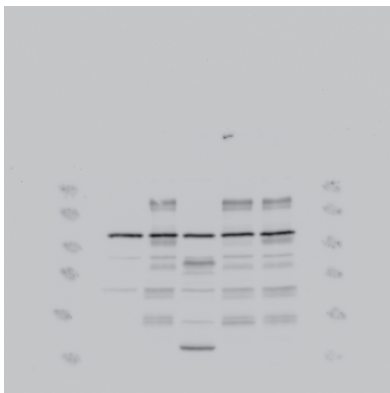

Bottom right panel

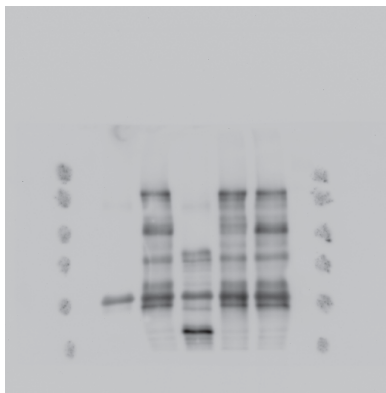

Figure 2B

Upper left panel

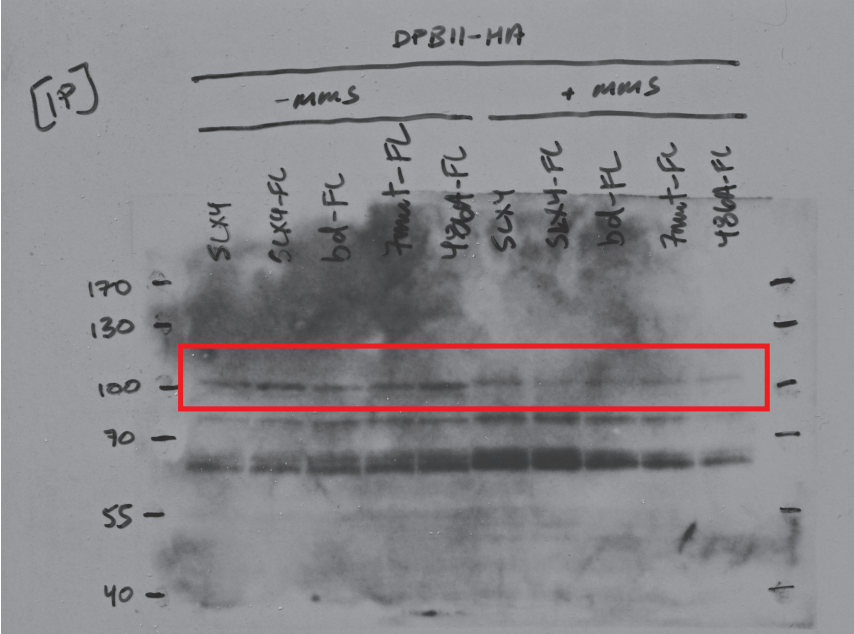

Upper right panel

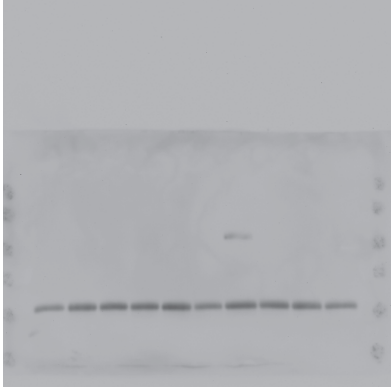

Bottom left panel

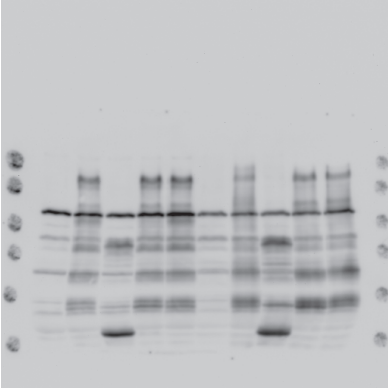

Bottom right panel

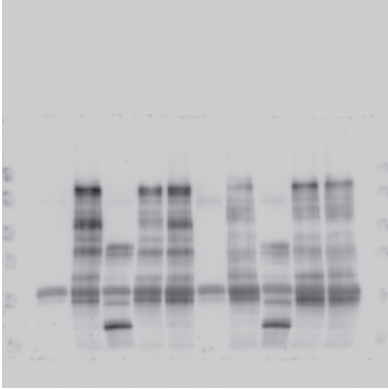

Supplement: embj0034-2182-sd9.pdf [file embj0034-2182-sd9.pdf]
