# Supplementary material
Source: PubMed Central journal article supplement (PMC4557669)

Figure 5B

Upper panel

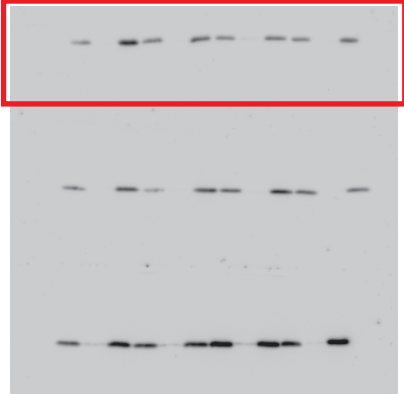

Lower Panel

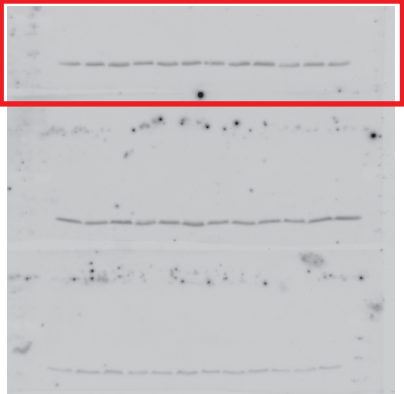

Figure 5C

Upper panel

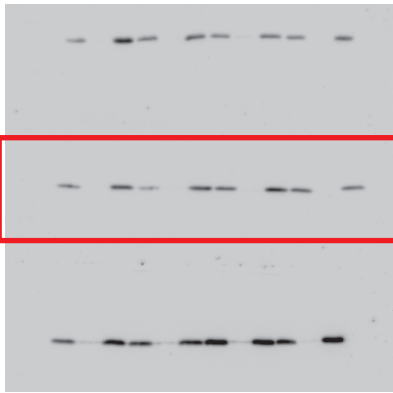

Middle Panel

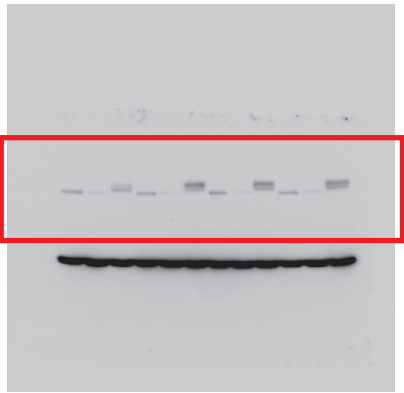

Lower Panel

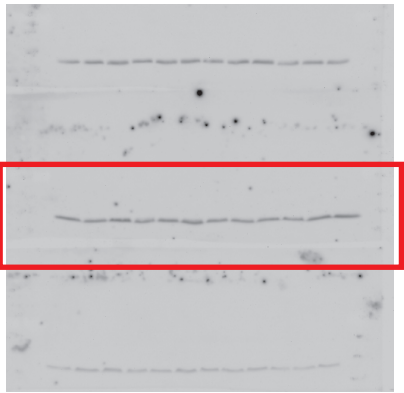

Figure 5E

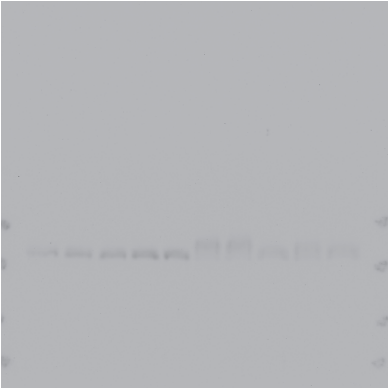

Figure 5F

Left panel

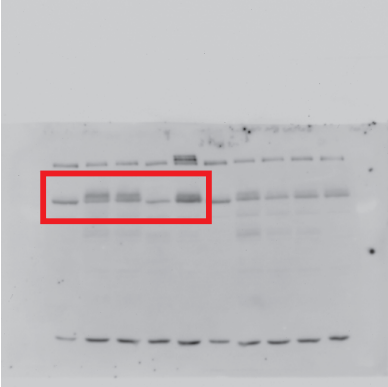

Right Panel

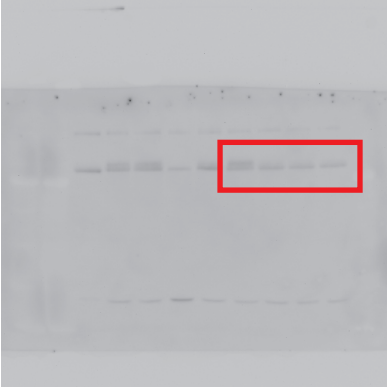

Supplement: embj0034-2182-sd12.pdf [file embj0034-2182-sd12.pdf]
