# Supplementary material
Source: PubMed Central journal article supplement (PMC4557669)

Figure 3G

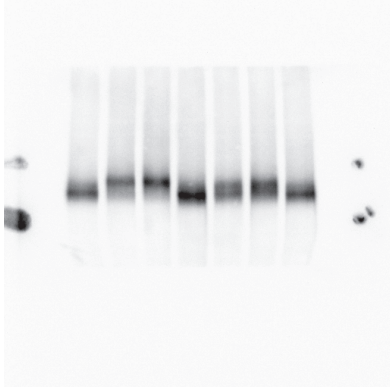

Supplement: embj0034-2182-sd10.pdf [file embj0034-2182-sd10.pdf]

Figure 4F

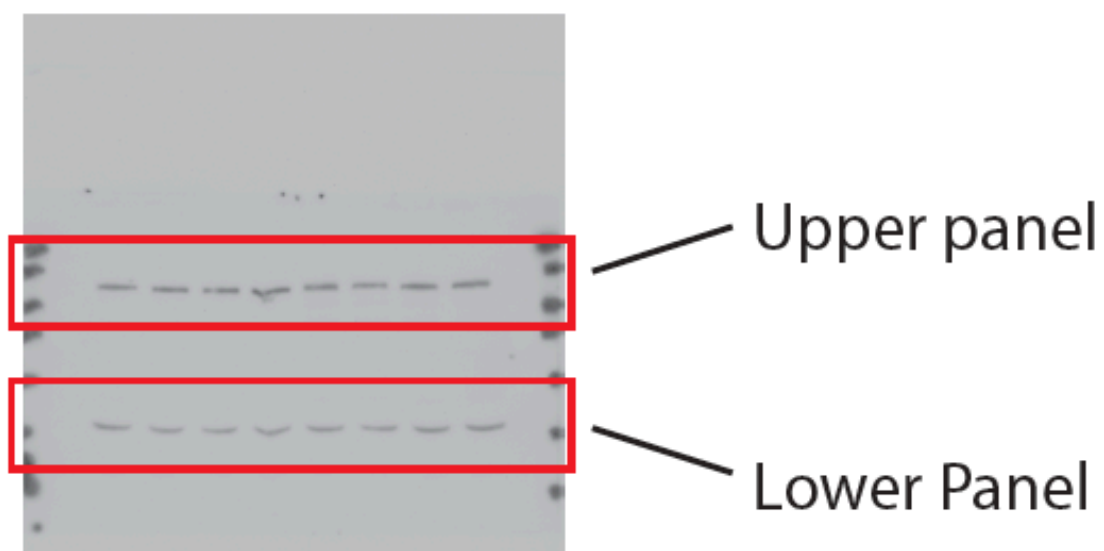

Supplement: embj0034-2182-sd11.pdf [file embj0034-2182-sd11.pdf]

Figure S2D

Upper panel

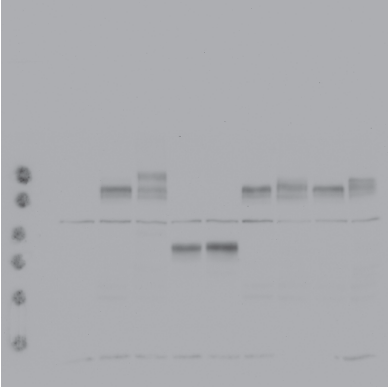

Bottom panel

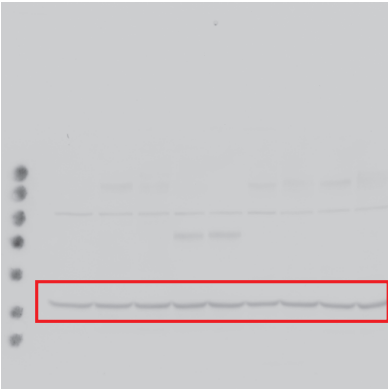

Figure S2E

Upper panels

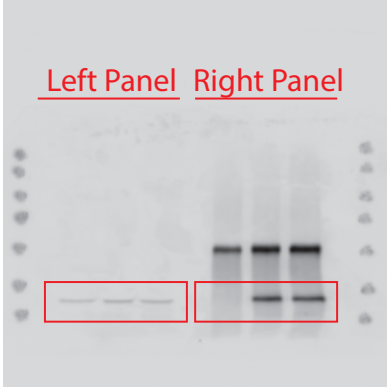

Bottom panels

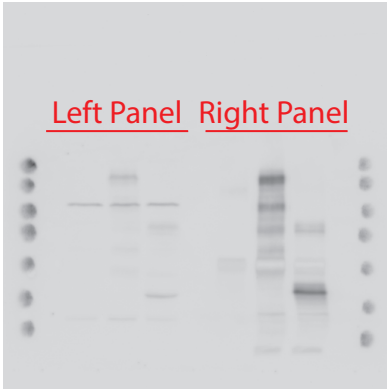

Supplement: embj0034-2182-sd7.pdf [file embj0034-2182-sd7.pdf]
